# Supplementary material for: Efficacy of Olopatadine versus Epinastine for Treating Allergic Conjunctivitis Caused by Japanese Cedar Pollen: A Double-Blind Randomized Controlled Trial
Source: PubMed Central journal article supplement — Adv Ther. 2014 Oct 1;31(10):1045–58. doi: 10.1007/s12325-014-0156-2 (PMC4209092; doi:10.1007/s12325-014-0156-2), 2014-10-01
Supplement: 12325_2014_156_MOESM1_ESM.pdf [file 12325_2014_156_MOESM1_ESM.pdf]

- A double-blind randomized control trial investigated the efficacy and safety of olopatadine versus epinastine for treating conjunctival allergic symptoms induced by exposure to Japanese cedar pollen in a conjunctival allergen challenge test.
- Fifty subjects were randomized to receive a single drop of olopatadine hydrochloride 0.1% ophthalmic solution in the right or left eye and one drop of epinastine hydrochloride 0.05% ophthalmic solution in the contralateral eye.
- Olopatadine reduced subject-assessed ocular itching at 7 and 15 minutes after allergen exposure and investigator-assessed conjunctival hyperemia at 7 and 20 minutes after allergen exposure compared with epinastine.
- There were no adverse events or changes in ocular variables or vital signs.
- This short-term study suggests that olopatadine 0.1% is more effective than epinastine 0.05% in suppressing ocular itching and hyperemia induced by Japanese cedar pollen during conjunctival allergen challenge tests.

This summary slide represents the opinions of the authors. Sponsorship and article processing charges for this study were provided by Alcon Japan Ltd. For a full list of acknowledgments and conflicts of interest for all authors of this article, please see the full text online. Copyright © The Author(s) 2014. Creative Commons Attribution Noncommercial License (CC BY-NC).
